# Supplementary material for: Self‐Rated Health Status and Risk of Ischemic Heart Disease in the China Kadoorie Biobank Study: A Population‐Based Cohort Study
Source: PubMed Central journal article supplement (PMC5634301; doi:10.1161/jaha.117.006595), 2017-09-22
Supplement: JAH3-6-e006595-s001.pdf [file JAH3-6-e006595-s001.pdf]

# **SUPPLEMENTAL MATERIAL**

**Table S1.** Characteristics of the China Kadoorie Biobank Study by Age-comparative Self-rated

Health Status at Baseline

| Variables                         | Total, N (%)  | Age-comparative self-rated health, N (%) |               |              |              |
|-----------------------------------|---------------|------------------------------------------|---------------|--------------|--------------|
|                                   |               | Better                                   | Same          | Worse        | Don't know   |
| <b>N</b>                          | 486541 (100)  | 90738 (18.7)                             | 309022 (63.5) | 71791 (14.8) | 14990 (3.1)  |
| <b>Age, years<sup>†</sup></b>     | 51.0 (10.5)   | 50.8 (10.7)                              | 50.9 (10.5)   | 51.4 (10.5)  | 53.8 (11.0)  |
| <b>Sex</b>                        |               |                                          |               |              |              |
| <b>Male</b>                       | 199113 (40.9) | 41752 (46.0)                             | 127283 (41.2) | 24690 (34.4) | 5388 (35.9)  |
| <b>Female</b>                     | 287428 (59.1) | 48986 (54.0)                             | 181739 (58.8) | 47101 (65.6) | 9602 (64.1)  |
| <b>Marital status</b>             |               |                                          |               |              |              |
| <b>Married</b>                    | 44228 (90.9)  | 82626 (91.0)                             | 282654 (91.4) | 63894 (89.0) | 13144 (87.7) |
| <b>Widowed</b>                    | 33081 (6.8)   | 5853 (6.5)                               | 20015 (6.5)   | 5793 (8.1)   | 1420 (9.5)   |
| <b>Separated/divorced</b>         | 7579 (1.6)    | 1765 (2.0)                               | 4178 (1.4)    | 1372 (1.9)   | 264 (1.7)    |
| <b>Never married</b>              | 3653 (0.7)    | 494 (0.5)                                | 2265 (0.7)    | 732 (1.0)    | 162 (1.1)    |
| <b>Education level</b>            |               |                                          |               |              |              |
| <b>No formal school</b>           | 90829 (18.7)  | 12931 (14.3)                             | 57403 (18.6)  | 17331 (24.1) | 3164 (21.1)  |
| <b>Primary</b>                    | 156407 (32.1) | 24060 (26.5)                             | 104137 (33.7) | 23403 (32.6) | 4807 (32.1)  |
| <b>Middle or high school</b>      | 211683 (43.5) | 45443 (50.1)                             | 131789 (42.6) | 28146 (39.2) | 6305 (42.0)  |
| <b>College/university or more</b> | 27622 (5.7)   | 8304 (9.1)                               | 15693 (5.1)   | 2911 (4.1)   | 714 (4.8)    |
| <b>Household income,</b>          |               |                                          |               |              |              |

**RMB**

|                      |               |              |              |              |             |
|----------------------|---------------|--------------|--------------|--------------|-------------|
| <b>&lt;10,000</b>    | 137893 (28.3) | 24621 (27.1) | 80679 (26.1) | 28885 (40.2) | 3708 (24.7) |
| <b>10,000-19,999</b> | 140432 (28.9) | 26004 (28.7) | 90375 (29.3) | 20027 (27.9) | 4026 (26.9) |
| <b>20,000-34,999</b> | 120197 (24.7) | 21718 (23.9) | 81437 (26.3) | 13752 (19.2) | 3290 (21.9) |
| <b>≥35,000</b>       | 88019 (18.1)  | 18395 (20.3) | 56531 (18.3) | 9127 (12.7)  | 3966 (26.5) |

**Occupation**

|                                       |               |              |               |              |             |
|---------------------------------------|---------------|--------------|---------------|--------------|-------------|
| <b>Farmers</b>                        | 208754 (42.9) | 33863 (37.3) | 137213 (44.4) | 33154 (46.2) | 4524 (30.2) |
| <b>Factory workers</b>                | 71331 (14.7)  | 14548 (16.0) | 46761 (15.1)  | 8466 (11.8)  | 1556 (10.4) |
| <b>Professionals and<br/>managers</b> | 64533 (13.3)  | 16501 (18.2) | 38609 (12.5)  | 7414 (10.3)  | 2009 (13.4) |
| <b>Retired</b>                        | 72156 (14.8)  | 16124 (17.8) | 43202 (14.0)  | 9286 (12.9)  | 3554 (23.6) |
| <b>Unemployed and<br/>others</b>      | 69767 (14.3)  | 9702 (10.7)  | 43237 (14.0)  | 13471 (18.8) | 3357 (22.4) |

**Administrative Region**

|              |               |              |               |              |              |
|--------------|---------------|--------------|---------------|--------------|--------------|
| <b>Rural</b> | 276755 (56.9) | 41227 (45.4) | 188614 (61.0) | 42215 (58.8) | 4699 (31.3)  |
| <b>Urban</b> | 209786 (43.1) | 49511 (54.6) | 120408 (39.0) | 29576 (41.2) | 10291 (68.7) |

**Geographical region**

|              |               |              |               |              |              |
|--------------|---------------|--------------|---------------|--------------|--------------|
| <b>North</b> | 190992 (39.3) | 45072 (49.7) | 115313 (37.3) | 29285 (40.8) | 1322 (8.8)   |
| <b>South</b> | 295549 (60.7) | 45666 (50.3) | 193709 (62.7) | 42506 (59.2) | 13668 (91.2) |

|                             |              |              |              |              |             |
|-----------------------------|--------------|--------------|--------------|--------------|-------------|
| <b>Sleep problems (Yes)</b> | 79756 (16.4) | 10244 (11.3) | 45539 (14.7) | 21159 (29.5) | 2814 (18.8) |
|-----------------------------|--------------|--------------|--------------|--------------|-------------|

**Cigarette smoking**

|              |               |              |               |              |              |
|--------------|---------------|--------------|---------------|--------------|--------------|
| <b>Never</b> | 301601 (62.0) | 52025 (57.3) | 192713 (62.4) | 46801 (65.2) | 10062 (67.1) |
|--------------|---------------|--------------|---------------|--------------|--------------|

|                                                     |                   |                   |                   |                  |                  |
|-----------------------------------------------------|-------------------|-------------------|-------------------|------------------|------------------|
| <b>Former</b>                                       | 26807 (5.5)       | 5428 (6.0)        | 16253 (5.2)       | 4385 (6.1)       | 741 (5.0)        |
| <b>Occasionally</b>                                 | 27872 (5.7)       | 5878 (6.5)        | 17153 (5.6)       | 3995 (5.6)       | 846 (5.6)        |
| <b>Current</b>                                      | 130261 (26.8)     | 27407 (30.2)      | 82903 (26.8)      | 16610 (23.1)     | 3341 (22.3)      |
| <b>Alcohol drinking</b>                             |                   |                   |                   |                  |                  |
| <b>Never</b>                                        | 222161 (45.7)     | 31476 (34.7)      | 145507 (47.1)     | 36254 (50.5)     | 8924 (59.5)      |
| <b>Ex-drinker</b>                                   | 7751 (1.6)        | 954 (1.1)         | 4419 (1.4)        | 2118 (3.0)       | 260 (1.7)        |
| <b>Occasionally</b>                                 | 172550 (35.4)     | 37489 (41.3)      | 107436 (34.8)     | 23796 (33.1)     | 3829 (25.6)      |
| <b>Weekly</b>                                       | 84079 (17.3)      | 80819 (22.9)      | 51660 (16.7)      | 9623 (13.4)      | 1977 (13.2)      |
| <b>Physical activity,<br/>MET-hr/wk<sup>†</sup></b> | 18.1 (10.8, 30.6) | 18.8 (11.2, 30.2) | 18.4 (11.0, 31.4) | 11.9 (9.6, 28.8) | 14.3 (8.4, 24.2) |
| <b>Menopausal status<br/>(women only)</b>           |                   |                   |                   |                  |                  |
| <b>Premenopause</b>                                 | 127325 (44.3)     | 23446 (47.9)      | 81960 (45.1)      | 18548 (39.4)     | 3371 (35.1)      |
| <b>Perimenopause</b>                                | 14354 (5.0)       | 2484 (5.1)        | 9157 (5.0)        | 2334 (4.9)       | 379 (4.0)        |
| <b>Postmenopause</b>                                | 145749 (50.7)     | 23056 (47.0)      | 90622 (49.9)      | 26219 (55.7)     | 5852 (60.9)      |
| <b>BMI, kg/m<sup>2</sup></b>                        |                   |                   |                   |                  |                  |
| <b>&lt;18.5</b>                                     | 21428 (4.4)       | 2244 (2.5)        | 13167 (4.2)       | 5117 (7.1)       | 900 (6.0)        |
| <b>18.5-23.9</b>                                    | 255773 (52.6)     | 44565 (49.1)      | 165503 (53.6)     | 37892 (52.8)     | 7813 (52.1)      |
| <b>24.0-27.9</b>                                    | 159677 (32.8)     | 33593 (37.0)      | 100406 (32.5)     | 20847 (29.0)     | 4831 (32.2)      |
| <b>≥28.0</b>                                        | 49663 (10.2)      | 10336 (11.4)      | 29946 (9.7)       | 7935 (11.1)      | 1446 (9.7)       |
| <b>Family history of<br/>heart disease (Yes)</b>    | 15379 (3.2)       | 3399 (3.8)        | 8946 (2.9)        | 2663 (3.7)       | 371 (2.5)        |

|                                           |               |              |               |              |             |
|-------------------------------------------|---------------|--------------|---------------|--------------|-------------|
| <b>Baseline major depression (Yes)</b>    | 2972 (0.6)    | 309 (0.3)    | 1308 (0.4)    | 1274 (1.8)   | 81 (0.5)    |
| <b>Baseline diabetes (Yes)</b>            | 26118 (5.4)   | 3380 (3.7)   | 14855 (4.8)   | 6878 (9.6)   | 1005 (6.7)  |
| <b>Baseline hypertension (Yes)</b>        | 158473 (32.6) | 26673 (29.4) | 101085 (32.7) | 25526 (35.6) | 5189 (34.6) |
| <b>Other baseline comorbidities (Yes)</b> | 229350 (47.1) | 38134 (42.0) | 141452 (45.8) | 42224 (58.8) | 7540 (50.3) |

---

\* Two-sided P values were derived from ANOVA for continuous variables and Chi-square test for categorical variables, all *P* values are <0.001.

† Data are shown as mean (standard deviation).

‡ Data are shown as median (P25, P75).

**Table S2.** Stratified Analysis: Risk of Ischemic Heart Disease According to Global Self-rated

Health Status

| Subgroups              | Cases/person-years | Model 1*          | Model 2 <sup>†</sup> | Model 3 <sup>‡</sup> | <i>P</i> for interaction |
|------------------------|--------------------|-------------------|----------------------|----------------------|--------------------------|
|                        |                    | HR (95% CI)       | HR (95% CI)          | HR (95% CI)          |                          |
| <b>Age</b>             |                    |                   |                      |                      |                          |
| 0.10                   |                    |                   |                      |                      |                          |
| <b>30-59 years old</b> |                    |                   |                      |                      |                          |
| Excellent              | 2070/515951        | 1.00              | 1.00                 | 1.00                 |                          |
| Good                   | 2950/818435        | 1.05 (0.99, 1.11) | 1.04 (0.99, 1.11)    | 1.03 (1.97, 1.09)    |                          |
| Fair                   | 6164/1133304       | 1.40 (1.33, 1.48) | 1.39 (1.32, 1.46)    | 1.33 (1.27, 1.40)    |                          |
| Poor                   | 1712/234020        | 2.02 (1.90, 2.16) | 1.96 (1.84, 2.10)    | 1.80 (1.68, 1.92)    |                          |
| <b>60-69 years old</b> |                    |                   |                      |                      |                          |
| Excellent              | 1091/82991         | 1.00              | 1.00                 | 1.00                 |                          |
| Good                   | 1650/148674        | 1.08 (1.00, 1.17) | 1.08 (0.99, 1.16)    | 1.06 (0.98, 1.15)    |                          |
| Fair                   | 3998/256820        | 1.44 (1.34, 1.54) | 1.41 (1.32, 1.51)    | 1.37 (1.27, 1.47)    |                          |
| Poor                   | 1112/57703         | 1.95 (1.79, 2.13) | 1.87 (1.72, 2.05)    | 1.75 (1.60, 1.91)    |                          |
| <b>70-79 years old</b> |                    |                   |                      |                      |                          |
| Excellent              | 577/25403          | 1.00              | 1.00                 | 1.00                 |                          |
| Good                   | 805/45009          | 0.96 (0.86, 1.07) | 0.95 (0.85, 1.06)    | 0.94 (0.84, 1.05)    |                          |
| Fair                   | 1986/85692         | 1.24 (1.13, 1.37) | 1.22 (1.10, 1.34)    | 1.19 (1.08, 1.31)    |                          |
| Poor                   | 590/19539          | 1.82 (1.62, 2.06) | 1.74 (1.54, 1.96)    | 1.66 (1.47, 1.88)    |                          |
| <b>Sex</b>             |                    |                   |                      |                      |                          |
| 0.59                   |                    |                   |                      |                      |                          |
| <b>Men</b>             |                    |                   |                      |                      |                          |

|                              |             |                   |                   |                   |        |
|------------------------------|-------------|-------------------|-------------------|-------------------|--------|
| <b>Excellent</b>             | 1760/287799 | 1.00              | 1.00              | 1.00              |        |
| <b>Good</b>                  | 2459/426251 | 1.06 (1.00, 1.13) | 1.06 (1.00, 1.13) | 1.05 (0.99, 1.12) |        |
| <b>Fair</b>                  | 4830/568999 | 1.39 (1.31, 1.47) | 1.37 (1.30, 1.45) | 1.32 (1.25, 1.40) |        |
| <b>Poor</b>                  | 1133/103122 | 1.96 (1.81, 2.12) | 1.91 (1.76, 2.06) | 1.76 (1.62, 1.90) |        |
| <hr/>                        |             |                   |                   |                   |        |
| <b>Women</b>                 |             |                   |                   |                   |        |
| <b>Excellent</b>             | 1978/336547 | 1.00              | 1.00              | 1.00              |        |
| <b>Good</b>                  | 2946/585867 | 1.03 (0.97, 1.09) | 1.02 (0.96, 1.08) | 1.00 (0.95, 1.06) |        |
| <b>Fair</b>                  | 7318/906817 | 1.38 (1.31, 1.45) | 1.36 (1.29, 1.43) | 1.31 (1.25, 1.38) |        |
| <b>Poor</b>                  | 2281/208140 | 1.96 (1.84, 2.09) | 1.89 (1.77, 2.01) | 1.76 (1.65, 1.87) |        |
| <hr/>                        |             |                   |                   |                   |        |
| <b>Administrative region</b> |             |                   |                   |                   | 0.43   |
| <hr/>                        |             |                   |                   |                   |        |
| <b>Rural</b>                 |             |                   |                   |                   |        |
| <b>Excellent</b>             | 1407/276017 | 1.00              | 1.00              | 1.00              |        |
| <b>Good</b>                  | 3228/650831 | 1.03 (0.96, 1.09) | 1.02 (0.96, 1.09) | 1.01 (0.95, 1.08) |        |
| <b>Fair</b>                  | 6331/847499 | 1.33 (1.25, 1.41) | 1.31 (1.23, 1.39) | 1.28 (1.21, 1.36) |        |
| <b>Poor</b>                  | 2096/202076 | 1.90 (1.77, 2.03) | 1.83 (1.71, 1.96) | 1.73 (1.61, 1.86) |        |
| <hr/>                        |             |                   |                   |                   |        |
| <b>Urban</b>                 |             |                   |                   |                   |        |
| <b>Excellent</b>             | 2331/348328 | 1.00              | 1.00              | 1.00              |        |
| <b>Good</b>                  | 2177/361287 | 1.05 (0.99, 1.11) | 1.04 (0.98, 1.11) | 1.03 (0.97, 1.09) |        |
| <b>Fair</b>                  | 5817/628317 | 1.43 (1.36, 1.51) | 1.41 (1.34, 1.48) | 1.35 (1.28, 1.42) |        |
| <b>Poor</b>                  | 1318/109186 | 2.00 (1.87, 2.15) | 1.92 (1.79, 2.06) | 1.74 (1.63, 1.87) |        |
| <hr/>                        |             |                   |                   |                   |        |
| <b>Geographical</b>          |             |                   |                   |                   | <0.001 |
| <hr/>                        |             |                   |                   |                   |        |

**region**

---

**North**

|                  |             |                   |                    |                   |
|------------------|-------------|-------------------|--------------------|-------------------|
| <b>Excellent</b> | 2795/297781 | 1.00              | 1.00               | 1.00              |
| <b>Good</b>      | 3149/377323 | 1.04 (0.99, 1.10) | 1.04 (0.99, 1.10)  | 1.03 (0.97, 1.08) |
| <b>Fair</b>      | 6169/541521 | 1.35 (1.29, 1.41) | 1.33 (1.27, 1.40)  | 1.29 (1.23, 1.35) |
| <b>Poor</b>      | 1888/118204 | 1.86 (1.76, 1.98) | 1.80 (1.70s, 1.92) | 1.67 (1.57, 1.78) |

---

**South**

|                  |             |                   |                   |                   |
|------------------|-------------|-------------------|-------------------|-------------------|
| <b>Excellent</b> | 943/326565  | 1.00              | 1.00              | 1.00              |
| <b>Good</b>      | 2256/634795 | 1.07 (0.99, 1.16) | 1.06 (0.99, 1.15) | 1.05 (0.98, 1.14) |
| <b>Fair</b>      | 5979/934295 | 1.47 (1.37, 1.58) | 1.45 (1.36, 1.56) | 1.41 (1.31, 1.51) |
| <b>Poor</b>      | 1526/193059 | 2.16 (1.99, 2.35) | 2.09 (1.93, 2.28) | 1.95 (1.79, 2.13) |

---

**Education**0.01

---

**No formal****education**

|                  |             |                   |                   |                   |
|------------------|-------------|-------------------|-------------------|-------------------|
| <b>Excellent</b> | 642/94398   | 1.00              | 1.00              | 1.00              |
| <b>Good</b>      | 1379/212064 | 1.02 (0.93, 1.12) | 1.00 (0.91, 1.11) | 1.00 (0.90, 1.09) |
| <b>Fair</b>      | 2800/258668 | 1.34 (1.22, 1.46) | 1.30 (1.19, 1.42) | 1.27 (1.16, 1.39) |
| <b>Poor</b>      | 1010/76573  | 1.75 (1.58, 1.94) | 1.66 (1.50, 1.84) | 1.59 (1.44, 1.77) |

---

**Primary school**

|                  |             |                   |                   |                   |
|------------------|-------------|-------------------|-------------------|-------------------|
| <b>Excellent</b> | 958/163372  | 1.00              | 1.00              | 1.00              |
| <b>Good</b>      | 1776/327991 | 1.03 (0.95, 1.12) | 1.03 (0.96, 1.12) | 1.02 (0.95, 1.11) |
| <b>Fair</b>      | 4169/495850 | 1.33 (1.24, 1.43) | 1.32 (1.23, 1.42) | 1.28 (1.19, 1.38) |



|                                |             |                   |                   |                   |
|--------------------------------|-------------|-------------------|-------------------|-------------------|
| <b>Poor</b>                    | 1205/110663 | 2.03 (1.86, 2.21) | 1.98 (1.81, 2.16) | 1.85 (1.69, 2.02) |
| <hr/>                          |             |                   |                   |                   |
| <b>Middle school or higher</b> |             |                   |                   |                   |
| <b>Excellent</b>               | 2138/366575 | 1.00              | 1.00              | 1.00              |
| <b>Good</b>                    | 2250/472063 | 1.05 (0.98, 1.11) | 1.04 (0.98, 1.10) | 1.03 (0.97, 1.09) |
| <b>Fair</b>                    | 5179/721298 | 1.43 (1.36, 1.51) | 1.41 (1.34, 1.48) | 1.35 (1.28, 1.42) |
| <b>Poor</b>                    | 1199/124027 | 2.02 (1.88, 2.17) | 1.94 (1.80, 2.09) | 1.76 (1.63, 1.90) |
| <hr/>                          |             |                   |                   |                   |
| <b>Income</b>                  |             |                   |                   | 0.03              |
| <hr/>                          |             |                   |                   |                   |
| <b>&lt;10,000</b>              |             |                   |                   |                   |
| <b>Excellent</b>               | 963/138097  | 1.00              | 1.00              | 1.00              |
| <b>Good</b>                    | 1534/268338 | 0.95 (0.88, 1.04) | 0.95 (0.88, 1.04) | 0.95 (0.87, 1.03) |
| <b>Fair</b>                    | 3569/442055 | 1.24 (1.15, 1.33) | 1.22 (1.14, 1.32) | 1.20 (1.11, 1.29) |
| <b>Poor</b>                    | 1563/142699 | 1.79 (1.65, 1.94) | 1.73 (1.59, 1.88) | 1.63 (1.50, 1.77) |
| <hr/>                          |             |                   |                   |                   |
| <b>10,000-34,999</b>           |             |                   |                   |                   |
| <b>Excellent</b>               | 2019/339702 | 1.00              | 1.00              | 1.00              |
| <b>Good</b>                    | 2833/543642 | 1.06 (1.00, 1.13) | 1.05 (0.99, 1.12) | 1.04 (0.98, 1.10) |
| <b>Fair</b>                    | 6721/811926 | 1.41 (1.34, 1.49) | 1.39 (1.32, 1.47) | 1.34 (1.27, 1.41) |
| <b>Poor</b>                    | 1555/138517 | 2.01 (1.88, 2.16) | 1.94 (1.81, 2.08) | 1.79 (1.67, 1.92) |
| <hr/>                          |             |                   |                   |                   |
| <b>≥35,000</b>                 |             |                   |                   |                   |
| <b>Excellent</b>               | 756/146546  | 1.00              | 1.00              | 1.00              |
| <b>Good</b>                    | 1038/200138 | 1.11 (1.01, 1.22) | 1.10 (1.00, 1.21) | 1.09 (0.99, 1.20) |
| <b>Fair</b>                    | 1858/221835 | 1.52 (1.39, 1.66) | 1.49 (1.36, 1.63) | 1.44 (1.32, 1.57) |

|                          |             |                   |                   |                   |
|--------------------------|-------------|-------------------|-------------------|-------------------|
| <b>Poor</b>              | 296/30047   | 2.01 (1.75, 2.30) | 1.92 (1.67, 2.21) | 1.78 (1.55, 2.05) |
| <b>Cigarette smoking</b> |             |                   |                   | 0.65              |
| <b>Never</b>             |             |                   |                   |                   |
| <b>Excellent</b>         | 2102/364220 | 1.00              | 1.00              | 1.00              |
| <b>Good</b>              | 3092/618264 | 1.03 (0.97, 1.09) | 1.02 (0.97, 1.08) | 1.01 (0.95, 1.07) |
| <b>Fair</b>              | 7544/949098 | 1.39 (1.32, 1.46) | 1.37 (1.31, 1.44) | 1.33 (1.26, 1.39) |
| <b>Poor</b>              | 2126/203022 | 1.94 (1.82, 2.06) | 1.87 (1.76, 2.00) | 1.74 (1.64, 1.86) |
| <b>Former</b>            |             |                   |                   |                   |
| <b>Excellent</b>         | 316/33514   | 1.00              | 1.00              | 1.00              |
| <b>Good</b>              | 460/53773   | 1.09 (0.94, 1.27) | 1.09 (0.94, 1.26) | 1.08 (0.93, 1.25) |
| <b>Fair</b>              | 991/76382   | 1.46 (1.28, 1.67) | 1.42 (1.25, 1.63) | 1.38 (1.21, 1.58) |
| <b>Poor</b>              | 312/18895   | 2.07 (1.76, 2.45) | 2.00 (1.69, 2.37) | 1.90 (1.60, 2.25) |
| <b>Current</b>           |             |                   |                   |                   |
| <b>Excellent</b>         | 1320/226611 | 1.00              | 1.00              | 1.00              |
| <b>Good</b>              | 1853/340081 | 1.05 (0.98, 1.13) | 1.05 (0.98, 1.13) | 1.04 (0.96, 1.11) |
| <b>Fair</b>              | 3613/450336 | 1.34 (1.26, 1.43) | 1.33 (1.24, 1.42) | 1.28 (1.20, 1.36) |
| <b>Poor</b>              | 976/89345   | 1.95 (1.79, 2.13) | 1.90 (1.75, 2.08) | 1.75 (1.60, 1.91) |
| <b>Alcohol drinking</b>  |             |                   |                   | 0.14              |
| <b>Never</b>             |             |                   |                   |                   |
| <b>Excellent</b>         | 1467/249874 | 1.00              | 1.00              | 1.00              |
| <b>Good</b>              | 2433/458946 | 1.00 (0.94, 1.07) | 1.00 (0.93, 1.06) | 0.98 (0.92, 1.05) |

|             |             |                   |                   |                   |
|-------------|-------------|-------------------|-------------------|-------------------|
| <b>Fair</b> | 6171/701208 | 1.36 (1.28, 1.44) | 1.35 (1.27, 1.43) | 1.30 (1.22, 1.38) |
| <b>Poor</b> | 1814/156203 | 1.81 (1.69, 1.94) | 1.78 (1.65, 1.91) | 1.65 (1.53, 1.77) |

---

**Former**

|                  |           |                   |                   |                   |
|------------------|-----------|-------------------|-------------------|-------------------|
| <b>Excellent</b> | 56/5892   | 1.00              | 1.00              | 1.00              |
| <b>Good</b>      | 119/11501 | 1.18 (0.85, 1.64) | 1.19 (0.86, 1.65) | 1.18 (0.85, 1.63) |
| <b>Fair</b>      | 317/24739 | 1.30 (0.97, 1.74) | 1.30 (0.97, 1.74) | 1.28 (0.95, 1.72) |
| <b>Poor</b>      | 148/9801  | 1.93 (1.40, 2.66) | 1.92 (1.39, 2.66) | 1.88 (1.36, 2.61) |

---

**Current**

|                  |             |                   |                   |                   |
|------------------|-------------|-------------------|-------------------|-------------------|
| <b>Excellent</b> | 2215/368579 | 1.00              | 1.00              | 1.00              |
| <b>Good</b>      | 2853/541671 | 1.07 (1.01, 1.13) | 1.07 (1.01, 1.13) | 1.05 (1.00, 1.12) |
| <b>Fair</b>      | 5660/749869 | 1.39 (1.32, 1.46) | 1.38 (1.31, 1.45) | 1.33 (1.27, 1.40) |
| <b>Poor</b>      | 1452/145258 | 2.06 (1.93, 2.21) | 2.03 (1.89, 2.17) | 1.88 (1.75, 2.01) |

---

**Physical activity**

0.19

---

**Low**

|                  |             |                   |                   |                   |
|------------------|-------------|-------------------|-------------------|-------------------|
| <b>Excellent</b> | 1695/160605 | 1.00              | 1.00              | 1.00              |
| <b>Good</b>      | 2303/267400 | 1.04 (0.98, 1.11) | 1.04 (0.97, 1.10) | 1.02 (0.96, 1.09) |
| <b>Fair</b>      | 6253/505584 | 1.40 (1.32, 1.48) | 1.38 (1.30, 1.46) | 1.33 (1.25, 1.40) |
| <b>Poor</b>      | 1959/117306 | 2.06 (1.92, 2.20) | 1.99 (1.86, 2.13) | 1.83 (1.71, 1.96) |

---

**Moderate**

|                  |             |                   |                   |                   |
|------------------|-------------|-------------------|-------------------|-------------------|
| <b>Excellent</b> | 1279/230251 | 1.00              | 1.00              | 1.00              |
| <b>Good</b>      | 1664/336986 | 1.03 (0.95, 1.11) | 1.02 (0.94, 1.09) | 1.00 (0.93, 1.08) |
| <b>Fair</b>      | 3498/495711 | 1.35 (1.26, 1.44) | 1.32 (1.24, 1.41) | 1.27 (1.19, 1.36) |

|                                   |             |                   |                   |                   |
|-----------------------------------|-------------|-------------------|-------------------|-------------------|
| <b>Poor</b>                       | 875/103363  | 1.82 (1.66, 1.99) | 1.75 (1.60, 1.92) | 1.62 (1.48, 1.78) |
| <hr/>                             |             |                   |                   |                   |
| <b>High</b>                       |             |                   |                   |                   |
| <b>Excellent</b>                  | 764/233490  | 1.00              | 1.00              | 1.00              |
| <b>Good</b>                       | 1438/407732 | 1.07 (0.97, 1.16) | 1.06 (0.97, 1.16) | 1.05 (0.96, 1.15) |
| <b>Fair</b>                       | 2397/474521 | 1.40 (1.29, 1.52) | 1.38 (1.27, 1.50) | 1.35 (1.24, 1.47) |
| <b>Poor</b>                       | 580/90593   | 1.86 (1.66, 2.08) | 1.81 (1.61, 2.02) | 1.73 (1.54, 1.94) |
| <hr/>                             |             |                   |                   |                   |
| <b>BMI</b>                        |             |                   |                   | 0.32              |
| <hr/>                             |             |                   |                   |                   |
| <b>&lt;18.5 kg/m<sup>2</sup></b>  |             |                   |                   |                   |
| <b>Excellent</b>                  | 106/17870   | 1.00              | 1.00              | 1.00              |
| <b>Good</b>                       | 212/33597   | 1.12 (0.88, 1.42) | 1.11 (0.88, 1.41) | 1.10 (0.87, 1.40) |
| <b>Fair</b>                       | 657/71552   | 1.51 (1.22, 1.87) | 1.48 (1.19, 1.83) | 1.44 (1.17, 1.79) |
| <b>Poor</b>                       | 292/22222   | 2.18 (1.73, 2.75) | 2.06 (1.63, 2.60) | 1.98 (1.57, 2.52) |
| <hr/>                             |             |                   |                   |                   |
| <b>18.5-23.9 kg/m<sup>2</sup></b> |             |                   |                   |                   |
| <b>Excellent</b>                  | 1580/322407 | 1.00              | 1.00              | 1.00              |
| <b>Good</b>                       | 2455/535525 | 1.05 (0.98, 1.12) | 1.04 (0.98, 1.11) | 1.03 (0.97, 1.10) |
| <b>Fair</b>                       | 5445/785795 | 1.38 (1.30, 1.46) | 1.36 (1.29, 1.45) | 1.32 (1.25, 1.40) |
| <b>Poor</b>                       | 1501/163667 | 1.98 (1.84, 2.13) | 1.92 (1.79, 2.07) | 1.79 (1.66, 1.93) |
| <hr/>                             |             |                   |                   |                   |
| <b>24.0-27.9 kg/m<sup>2</sup></b> |             |                   |                   |                   |
| <b>Excellent</b>                  | 1490/220322 | 1.00              | 1.00              | 1.00              |
| <b>Good</b>                       | 1929/342523 | 1.01 (0.94, 1.08) | 1.01 (0.94, 1.08) | 0.99 (0.93, 1.06) |
| <b>Fair</b>                       | 4249/470164 | 1.37 (1.29, 1.46) | 1.35 (1.27, 1.44) | 1.30 (1.22, 1.38) |
| <b>Poor</b>                       | 1069/91315  | 1.89 (1.74, 2.05) | 1.81 (1.67, 1.97) | 1.67 (1.54, 1.81) |
| <hr/>                             |             |                   |                   |                   |

**≥28.0 kg/m<sup>2</sup>**

|                  |             |                   |                   |                   |
|------------------|-------------|-------------------|-------------------|-------------------|
| <b>Excellent</b> | 562/63747   | 1.00              | 1.00              | 1.00              |
| <b>Good</b>      | 809/100473  | 1.10 (0.99, 1.23) | 1.09 (0.98, 1.22) | 1.08 (0.97, 1.21) |
| <b>Fair</b>      | 1797/148305 | 1.40 (1.27, 1.55) | 1.38 (1.25, 1.52) | 1.33 (1.20, 1.46) |
| <b>Poor</b>      | 552/34058   | 1.96 (1.73, 2.21) | 1.89 (1.67, 2.14) | 1.74 (1.53, 1.97) |

---

**History of** 0.78  
**diabetes**

---

**No**

|                  |               |                   |                   |                   |
|------------------|---------------|-------------------|-------------------|-------------------|
| <b>Excellent</b> | 3431/603383   | 1.00              | 1.00              | 1.00              |
| <b>Good</b>      | 4964/975069   | 1.04 (0.99, 1.09) | 1.03 (0.99, 1.08) | 1.02 (0.98, 1.07) |
| <b>Fair</b>      | 10741/1391903 | 1.37 (1.32, 1.43) | 1.36 (1.30, 1.41) | 1.33 (1.27, 1.38) |
| <b>Poor</b>      | 2807/281472   | 1.92 (1.82, 2.02) | 1.87 (1.77, 1.97) | 1.78 (1.69, 1.88) |

**Yes**

|                  |            |                   |                   |                   |
|------------------|------------|-------------------|-------------------|-------------------|
| <b>Excellent</b> | 307/20962  | 1.00              | 1.00              | 1.00              |
| <b>Good</b>      | 441/37050  | 1.03 (0.89, 1.20) | 1.03 (0.89, 1.19) | 1.03 (0.89, 1.19) |
| <b>Fair</b>      | 1407/83913 | 1.29 (1.14, 1.47) | 1.27 (1.12, 1.44) | 1.25 (1.10, 1.42) |
| <b>Poor</b>      | 607/29790  | 1.69 (1.47, 1.95) | 1.62 (1.40, 1.87) | 1.57 (1.36, 1.81) |

---

**History of** 0.13  
**hypertension**

---

**No**

|                  |             |                   |                   |                   |
|------------------|-------------|-------------------|-------------------|-------------------|
| <b>Excellent</b> | 2057/451148 | 1.00              | 1.00              | 1.00              |
| <b>Good</b>      | 2747/694975 | 1.05 (0.99, 1.11) | 1.05 (0.99, 1.11) | 1.04 (0.98, 1.10) |

|                  |             |                   |                   |                   |
|------------------|-------------|-------------------|-------------------|-------------------|
| <b>Fair</b>      | 5625/987276 | 1.34 (1.27, 1.41) | 1.33 (1.26, 1.40) | 1.30 (1.24, 1.37) |
| <b>Poor</b>      | 1499/199089 | 1.93 (1.80, 2.06) | 1.89 (1.76, 2.03) | 1.80 (1.68, 1.93) |
| <hr/>            |             |                   |                   |                   |
| <b>Yes</b>       |             |                   |                   |                   |
| <b>Excellent</b> | 1681/173198 | 1.00              | 1.00              | 1.00              |
| <b>Good</b>      | 2658/317143 | 1.02 (0.96, 1.09) | 1.01 (0.95, 1.08) | 1.01 (0.95, 1.08) |
| <b>Fair</b>      | 6523/488539 | 1.37 (1.30, 1.45) | 1.35 (1.28, 1.43) | 1.33 (1.26, 1.41) |
| <b>Poor</b>      | 1915/112174 | 1.87 (1.75, 2.00) | 1.80 (1.68, 1.92) | 1.73 (1.62, 1.86) |

\* Model 1: adjusted for age, marital status, education level, household income, occupation, and menopausal status;

† Model 2: model 1 plus sleep problems, cigarette smoking, alcohol drinking, physical activity, body mass index, and family history of heart disease;

‡ Model 3: model 2 plus baseline major depression, diabetes, hypertension and other comorbidities.

**Table S3.** Sensitivity Analysis: Risk of Ischemic Heart Disease According to Age- Self-rated

| Health Status                 |                    |                   |                   |                   |
|-------------------------------|--------------------|-------------------|-------------------|-------------------|
| Age-comparative               |                    | Model 1*          | Model 2†          | Model 3‡          |
| self-rated health             | Cases/person-years | HR (95% CI)       | HR (95% CI)       | HR (95% CI)       |
| <b>Including “don’t know”</b> |                    |                   |                   |                   |
| Better                        | 4038/649835        | 1.00              | 1.00              | 1.00              |
| Same                          | 14939/2172181      | 1.27 (1.22, 1.31) | 1.26 (1.21, 1.31) | 1.23 (1.19, 1.27) |
| Worse                         | 5048/501051        | 1.96 (1.87, 2.04) | 1.91 (1.83, 1.99) | 1.78 (1.70, 1.86) |
| don’t know                    | 680/100476         | 1.53 (1.41,1.67)  | 1.51 (1.39,1.64)  | 1.46 (1.34,1.59)  |

\* Model 1: adjusted for age, marital status, education level, household income, occupation, and menopausal status;

† Model 2: model 1 plus sleep problems, cigarette smoking, alcohol drinking, physical activity, body mass index, and family history of heart disease;

‡ Model 3: model 2 plus baseline major depression, diabetes, hypertension and other comorbidities.

**Table S4.** Stratified Analysis: Risk of Ischemic Heart Disease According to Age-comparative

Self-rated Health Status

| Subgroups              | Cases/person-years | Model 1*          | Model 2 <sup>†</sup> | Model 3 <sup>‡</sup> | <i>P</i> for interaction |
|------------------------|--------------------|-------------------|----------------------|----------------------|--------------------------|
|                        |                    | HR (95% CI)       | HR (95% CI)          | HR (95% CI)          |                          |
| <b>Age</b>             |                    |                   |                      |                      |                          |
| <b>30-59 years old</b> |                    |                   |                      |                      |                          |
| Better                 | 2015/511321        | 1.00              | 1.00                 | 1.00                 | 0.14                     |
| Same                   | 7828/1726348       | 1.26 (1.20, 1.32) | 1.26 (1.20, 1.32)    | 1.23 (1.17, 1.29)    |                          |
| Worse                  | 2761/394268        | 1.97 (1.86, 2.09) | 1.93 (1.82, 2.05)    | 1.78 (1.68, 1.89)    |                          |
| <b>60-69 years old</b> |                    |                   |                      |                      |                          |
| Better                 | 1311/103743        | 1.00              | 1.00                 | 1.00                 | 0.34                     |
| Same                   | 4769/339072        | 1.30 (1.22, 1.39) | 1.29 (1.21, 1.37)    | 1.26 (1.18, 1.34)    |                          |
| Worse                  | 1548/82252         | 1.94 (1.80, 2.09) | 1.88 (1.74, 2.03)    | 1.76 (1.62, 1.90)    |                          |
| <b>70-79 years old</b> |                    |                   |                      |                      |                          |
| Better                 | 712/34771          | 1.00              | 1.00                 | 1.00                 | 0.34                     |
| Same                   | 2342/106761        | 1.24 (1.13, 1.35) | 1.22 (1.12, 1.33)    | 1.20 (1.10, 1.31)    |                          |
| Worse                  | 739/24531          | 1.97 (1.77, 2.19) | 1.89 (1.69, 2.11)    | 1.82 (1.63, 2.03)    |                          |
| <b>Sex</b>             |                    |                   |                      |                      |                          |
| <b>Men</b>             |                    |                   |                      |                      |                          |
| Better                 | 1955/296829        | 1.00              | 1.00                 | 1.00                 | 0.34                     |
| Same                   | 6243/885507        | 1.22 (1.16, 1.29) | 1.22 (1.16, 1.29)    | 1.19 (1.13, 1.25)    |                          |
| Worse                  | 1720/168252        | 1.93 (1.80, 2.06) | 1.90 (1.78, 2.03)    | 1.77 (1.65, 1.89)    |                          |



**Women**

|               |              |                   |                   |                   |
|---------------|--------------|-------------------|-------------------|-------------------|
| <b>Better</b> | 2083/353006  | 1.00              | 1.00              | 1.00              |
| <b>Same</b>   | 8696/1286673 | 1.31 (1.24, 1.37) | 1.29 (1.23, 1.36) | 1.26 (1.20, 1.33) |
| <b>Worse</b>  | 3328/332799  | 1.99 (1.88, 2.10) | 1.92 (1.82, 2.04) | 1.80 (1.70, 1.90) |

---

**Administrative**

0.96

**region**

---

**Rural**

|               |              |                   |                   |                   |
|---------------|--------------|-------------------|-------------------|-------------------|
| <b>Better</b> | 1484/301125  | 1.00              | 1.00              | 1.00              |
| <b>Same</b>   | 8453/1344074 | 1.25 (1.18, 1.32) | 1.24 (1.17, 1.31) | 1.22 (1.15, 1.29) |
| <b>Worse</b>  | 2855/297499  | 1.88 (1.76, 2.01) | 1.83 (1.71, 1.95) | 1.74 (1.63, 1.86) |

---

**Urban**

|               |             |                   |                   |                   |
|---------------|-------------|-------------------|-------------------|-------------------|
| <b>Better</b> | 2554/348710 | 1.00              | 1.00              | 1.00              |
| <b>Same</b>   | 6486/828107 | 1.28 (1.22, 1.34) | 1.27 (1.21, 1.33) | 1.23 (1.18, 1.29) |
| <b>Worse</b>  | 2193/203552 | 2.02 (1.90, 2.14) | 1.95 (1.84, 2.07) | 1.79 (1.68, 1.90) |

---

**Geographical**

&lt;0.001

**region**

---

**North**

|               |             |                   |                   |                   |
|---------------|-------------|-------------------|-------------------|-------------------|
| <b>Better</b> | 3047/321838 | 1.00              | 1.00              | 1.00              |
| <b>Same</b>   | 7895/799026 | 1.26 (1.21, 1.32) | 1.26 (1.21, 1.31) | 1.23 (1.18, 1.28) |
| <b>Worse</b>  | 2917/204427 | 1.85 (1.76, 1.95) | 1.81 (1.71, 1.90) | 1.68 (1.59, 1.77) |

---

**South**

|               |            |      |      |      |
|---------------|------------|------|------|------|
| <b>Better</b> | 991/327997 | 1.00 | 1.00 | 1.00 |
|---------------|------------|------|------|------|

|                                |              |                   |                    |                   |
|--------------------------------|--------------|-------------------|--------------------|-------------------|
| <b>Same</b>                    | 7044/1373155 | 1.29 (1.21, 1.39) | 1.29 (1.20, 1.38)  | 1.26 (1.18, 1.35) |
| <b>Worse</b>                   | 2131/296624  | 2.15 (1.99, 2.32) | 2.10 (1.94, 2.27)  | 1.98 (1.83, 2.14) |
| <b>Education</b>               |              |                   |                    | 0.09              |
| <b>No formal school</b>        |              |                   |                    |                   |
| <b>Better</b>                  | 663/93968    | 1.00              | 1.00               | 1.00              |
| <b>Same</b>                    | 3515/406313  | 1.25 (1.15, 1.36) | 1.23 (1.13, 1.34)  | 1.21 (1.11, 1.32) |
| <b>Worse</b>                   | 1469/120336  | 1.78 (1.62, 1.95) | 1.70 (1.55, 1.87)  | 1.63 (1.48, 1.80) |
| <b>Primary</b>                 |              |                   |                    |                   |
| <b>Better</b>                  | 1030/172323  | 1.00              | 1.00               | 1.00              |
| <b>Same</b>                    | 5260/730695  | 1.24 (1.15, 1.33) | 1.23 (1.15, 1.32)  | 1.20 (1.12, 1.29) |
| <b>Worse</b>                   | 1611/161926  | 1.98 (1.83, 2.15) | 1.94 (1.79, 2.1, ) | 1.81 (1.67, 1.97) |
| <b>Middle school or higher</b> |              |                   |                    |                   |
| <b>Better</b>                  | 2345/383544  | 1.00              | 1.00               | 1.00              |
| <b>Same</b>                    | 6164/1035173 | 1.28 (1.22, 1.35) | 1.28 (1.22, 1.34)  | 1.24 (1.18, 1.30) |
| <b>Worse</b>                   | 1968/218789  | 2.04 (1.92, 2.17) | 1.99 (1.87, 2.12)  | 1.83 (1.72, 1.95) |
| <b>Income</b>                  |              |                   |                    | 0.04              |
| <b>&lt;10,000</b>              |              |                   |                    |                   |
| <b>Better</b>                  | 1160/179879  | 1.00              | 1.00               | 1.00              |
| <b>Same</b>                    | 4233/581341  | 1.17 (1.09, 1.25) | 1.16 (1.09, 1.24)  | 1.14 (1.07, 1.22) |
| <b>Worse</b>                   | 2071/203782  | 1.74 (1.62, 1.88) | 1.69 (1.57, 1.82)  | 1.60 (1.48, 1.73) |
| <b>10,000-34,999</b>           |              |                   |                    |                   |

|                          |              |                   |                   |                   |       |
|--------------------------|--------------|-------------------|-------------------|-------------------|-------|
| <b>Better</b>            | 2013/342640  | 1.00              | 1.00              | 1.00              |       |
| <b>Same</b>              | 8244/1205969 | 1.31 (1.25, 1.38) | 1.30 (1.24, 1.37) | 1.27 (1.21, 1.33) |       |
| <b>Worse</b>             | 2458/235471  | 2.09 (1.97, 2.21) | 2.03 (1.91, 2.16) | 1.89 (1.78, 2.01) |       |
| <hr/>                    |              |                   |                   |                   |       |
| <b>≥35,000</b>           |              |                   |                   |                   |       |
| <b>Better</b>            | 775/127316   | 1.00              | 1.00              | 1.00              |       |
| <b>Same</b>              | 2462/384871  | 1.29 (1.18, 1.41) | 1.29 (1.18, 1.40) | 1.26 (1.15, 1.37) |       |
| <b>Worse</b>             | 519/61798    | 1.94 (1.73, 2.18) | 1.89 (1.68, 2.12) | 1.76 (1.57, 1.98) |       |
| <hr/>                    |              |                   |                   |                   |       |
| <b>Cigarette smoking</b> |              |                   |                   |                   | 0.21  |
| <hr/>                    |              |                   |                   |                   |       |
| <b>Never</b>             |              |                   |                   |                   |       |
| <b>Better</b>            | 2194/374639  | 1.00              | 1.00              | 1.00              |       |
| <b>Same</b>              | 9066/1361516 | 1.31 (1.25, 1.37) | 1.30 (1.24, 1.36) | 1.27 (1.21, 1.33) |       |
| <b>Worse</b>             | 3170/330686  | 1.97 (1.86, 2.08) | 1.91 (1.81, 2.02) | 1.79 (1.69, 1.89) |       |
| <hr/>                    |              |                   |                   |                   |       |
| <b>Former</b>            |              |                   |                   |                   |       |
| <b>Better</b>            | 383/38017    | 1.00              | 1.00              | 1.00              |       |
| <b>Same</b>              | 1208/111150  | 1.31 (1.16, 1.47) | 1.30 (1.15, 1.46) | 1.27 (1.12, 1.43) |       |
| <b>Worse</b>             | 439/28689    | 2.06 (1.78, 2.37) | 2.01 (1.73, 2.33) | 1.90 (1.64, 2.21) |       |
| <hr/>                    |              |                   |                   |                   |       |
| <b>Current</b>           |              |                   |                   |                   |       |
| <b>Better</b>            | 1461/237179  | 1.00              | 1.00              | 1.00              |       |
| <b>Same</b>              | 4665/699514  | 1.18 (1.11, 1.26) | 1.18 (1.11, 1.26) | 1.15 (1.08, 1.22) |       |
| <b>Worse</b>             | 1439/141675  | 1.91 (1.77, 2.06) | 1.88 (1.74, 2.03) | 1.74 (1.61, 1.88) |       |
| <hr/>                    |              |                   |                   |                   |       |
| <b>Alcohol drinking</b>  |              |                   |                   |                   | 0.006 |
| <hr/>                    |              |                   |                   |                   |       |

**Never**

|               |              |                   |                   |                   |
|---------------|--------------|-------------------|-------------------|-------------------|
| <b>Better</b> | 1430/226918  | 1.00              | 1.00              | 1.00              |
| <b>Same</b>   | 7371/1026479 | 1.25 (1.18, 1.33) | 1.25 (1.18, 1.33) | 1.22 (1.15, 1.29) |
| <b>Worse</b>  | 2670/253196  | 1.81 (1.70, 1.94) | 1.79 (1.68, 1.91) | 1.67 (1.56, 1.78) |

---

**Former**

|               |           |                   |                   |                   |
|---------------|-----------|-------------------|-------------------|-------------------|
| <b>Better</b> | 68/6707   | 1.00              | 1.00              | 1.00              |
| <b>Same</b>   | 359/29972 | 1.17 (0.89, 1.54) | 1.19 (0.90, 1.56) | 1.17 (0.89, 1.54) |
| <b>Worse</b>  | 187/13611 | 1.76 (1.32, 2.35) | 1.77 (1.32, 2.37) | 1.76 (1.31, 2.36) |

---

**Current**

|               |              |                   |                   |                   |
|---------------|--------------|-------------------|-------------------|-------------------|
| <b>Better</b> | 2540/416209  | 1.00              | 1.00              | 1.00              |
| <b>Same</b>   | 7209/1115730 | 1.26 (1.21, 1.32) | 1.27 (1.21, 1.33) | 1.23 (1.18, 1.29) |
| <b>Worse</b>  | 2191/234245  | 2.06 (1.94, 2.18) | 2.04 (1.93, 2.17) | 1.91 (1.80, 2.03) |

---

**Physical activity**

0.11

**Low**

|               |             |                   |                   |                   |
|---------------|-------------|-------------------|-------------------|-------------------|
| <b>Better</b> | 1914/182631 | 1.00              | 1.00              | 1.00              |
| <b>Same</b>   | 7196/656658 | 1.28 (1.21, 1.34) | 1.27 (1.2, 1.34)  | 1.23 (1.17, 1.30) |
| <b>Worse</b>  | 2703/170373 | 2.05 (1.93, 2.18) | 2.00 (1.88, 2.12) | 1.84 (1.73, 1.96) |

---

**Moderate**

|               |             |                   |                   |                   |
|---------------|-------------|-------------------|-------------------|-------------------|
| <b>Better</b> | 1350/240532 | 1.00              | 1.00              | 1.00              |
| <b>Same</b>   | 4388/722107 | 1.27 (1.19, 1.35) | 1.26 (1.18, 1.34) | 1.24 (1.16, 1.32) |
| <b>Worse</b>  | 1380/168379 | 1.91 (1.77, 2.06) | 1.87 (1.73, 2.02) | 1.75 (1.61, 1.89) |

---

**High**

|                                   |              |                   |                   |                   |
|-----------------------------------|--------------|-------------------|-------------------|-------------------|
| <b>Better</b>                     | 774/226671   | 1.00              | 1.00              | 1.00              |
| <b>Same</b>                       | 3355/793416  | 1.21 (1.12, 1.31) | 1.21 (1.11, 1.31) | 1.19 (1.10, 1.29) |
| <b>Worse</b>                      | 965/162299   | 1.72 (1.56, 1.90) | 1.69 (1.53, 1.87) | 1.63 (1.47, 1.80) |
| <b>BMI</b>                        |              |                   |                   | 0.21              |
| <b>&lt;18.5 kg/m<sup>2</sup></b>  |              |                   |                   |                   |
| <b>Better</b>                     | 107/15798    | 1.00              | 1.00              | 1.00              |
| <b>Same</b>                       | 741/89954    | 1.38 (1.12, 1.71) | 1.35 (1.09, 1.67) | 1.34 (1.08, 1.65) |
| <b>Worse</b>                      | 387/33516    | 1.97 (1.58, 2.46) | 1.85 (1.47, 2.31) | 1.79 (1.42, 2.24) |
| <b>18.5-23.9 kg/m<sup>2</sup></b> |              |                   |                   |                   |
| <b>Better</b>                     | 1617/319765  | 1.00              | 1.00              | 1.00              |
| <b>Same</b>                       | 6784/1168757 | 1.27 (1.20, 1.34) | 1.26 (1.19, 1.34) | 1.24 (1.17, 1.31) |
| <b>Worse</b>                      | 2262/266220  | 2.03 (1.90, 2.16) | 1.98 (1.85, 2.11) | 1.85 (1.73, 1.98) |
| <b>24.0-27.9 kg/m<sup>2</sup></b> |              |                   |                   |                   |
| <b>Better</b>                     | 1671/240369  | 1.00              | 1.00              | 1.00              |
| <b>Same</b>                       | 5256/705365  | 1.24 (1.17, 1.31) | 1.23 (1.16, 1.30) | 1.20 (1.13, 1.27) |
| <b>Worse</b>                      | 1575/146361  | 1.90 (1.77, 2.05) | 1.82 (1.70, 1.96) | 1.69 (1.57, 1.82) |
| <b>≥28.0 kg/m<sup>2</sup></b>     |              |                   |                   |                   |
| <b>Better</b>                     | 643/73903    | 1.00              | 1.00              | 1.00              |
| <b>Same</b>                       | 2158/208105  | 1.33 (1.22, 1.46) | 1.32 (1.21, 1.45) | 1.29 (1.17, 1.41) |
| <b>Worse</b>                      | 824/54954    | 1.96 (1.76, 2.18) | 1.90 (1.71, 2.12) | 1.75 (1.57, 1.96) |
| <b>History of diabetes</b>        |              |                   |                   | 0.58              |

|                                |               |                   |                   |                   |
|--------------------------------|---------------|-------------------|-------------------|-------------------|
| <b>No</b>                      |               |                   |                   |                   |
| <b>Better</b>                  | 3688/627060   | 1.00              | 1.00              | 1.00              |
| <b>Same</b>                    | 13489/2073825 | 1.26 (1.21, 1.31) | 1.26 (1.21, 1.30) | 1.24 (1.19, 1.28) |
| <b>Worse</b>                   | 4177/456726   | 1.90 (1.82, 1.99) | 1.87 (1.79, 1.96) | 1.80 (1.71, 1.88) |
| <hr/>                          |               |                   |                   |                   |
| <b>Yes</b>                     |               |                   |                   |                   |
| <b>Better</b>                  | 350/22775     | 1.00              | 1.00              | 1.00              |
| <b>Same</b>                    | 1450/98355    | 1.18 (1.04, 1.33) | 1.16 (1.03, 1.31) | 1.15 (1.02, 1.30) |
| <b>Worse</b>                   | 871/44325     | 1.72 (1.51, 1.95) | 1.65 (1.45, 1.88) | 1.60 (1.41, 1.83) |
| <hr/>                          |               |                   |                   |                   |
| <b>History of hypertension</b> |               |                   |                   | 0.67              |
| <hr/>                          |               |                   |                   |                   |
| <b>No</b>                      |               |                   |                   |                   |
| <b>Better</b>                  | 2110/461306   | 1.00              | 1.00              | 1.00              |
| <b>Same</b>                    | 7229/1476027  | 1.26 (1.2, 1.33)  | 1.26 (1.2, 1.33)  | 1.25 (1.18, 1.31) |
| <b>Worse</b>                   | 2262/328713   | 1.9 (1.79, 2.02)  | 1.87 (1.76, 1.99) | 1.79 (1.68, 1.91) |
| <hr/>                          |               |                   |                   |                   |
| <b>Yes</b>                     |               |                   |                   |                   |
| <b>Better</b>                  | 1928/188528   | 1.00              | 1.00              | 1.00              |
| <b>Same</b>                    | 7710/696154   | 1.23 (1.17, 1.30) | 1.22 (1.16, 1.29) | 1.21 (1.15, 1.28) |
| <b>Worse</b>                   | 2786/172338   | 1.89 (1.78, 2.01) | 1.83 (1.72, 1.94) | 1.77 (1.66, 1.88) |

\*Model 1: adjusted for age, marital status, education level, household income, occupation, and menopausal status;

†Model 2: model 1 plus sleep problems, cigarette smoking, alcohol drinking, physical activity, body mass index, and family history of heart disease;

‡Model 3: model 2 plus baseline major depression, diabetes, hypertension and other comorbidities.

**Table S5.** Risk of Ischemic Heart Disease According to Two Measures of Self-rated Health Status

| <b>Exposures</b>                         | <b>A*</b>          | <b>B†</b>          | <b>C‡</b>          |
|------------------------------------------|--------------------|--------------------|--------------------|
|                                          | <b>HR (95% CI)</b> | <b>HR (95% CI)</b> | <b>HR (95% CI)</b> |
| <b>Global self-rated health</b>          |                    |                    |                    |
| <b>(Reference=Excellent)</b>             |                    |                    |                    |
| <b>Good</b>                              | 1.02 (0.98, 1.07)  |                    | 0.98 (0.94, 1.03)  |
| <b>Fair</b>                              | 1.32 (1.27, 1.37)  |                    | 1.19 (1.14, 1.25)  |
| <b>Poor</b>                              | 1.76 (1.68, 1.85)  |                    | 1.37 (1.29, 1.45)  |
| <b>Age-comparative self-rated health</b> |                    |                    |                    |
| <b>(Reference=Better)§</b>               |                    |                    |                    |
| <b>Same</b>                              |                    | 1.23 (1.19, 1.27)  | 1.14 (1.10, 1.19)  |
| <b>Worse</b>                             |                    | 1.78 (1.70, 1.86)  | 1.46 (1.37, 1.53)  |
| <b>Don't know</b>                        |                    | 1.46 (1.34, 1.59)  | 1.27 (1.17, 1.39)  |

\* only global self-rated health was included in model 3 (adjusted for age, marital status, education level, household income, occupation, and menopausal status, sleep problems, cigarette smoking, alcohol drinking, physical activity, body mass index, family history of heart disease, baseline major depression, diabetes, hypertension, and other comorbidities).

† only age-comparative self-rated health was included in model 3.

‡ both global self-rated health and age-comparative self-rated health were included in model 3.

§ Participants who reported “don’t know” to the age-comparative self-rated health question were not excluded in this analysis.

**Table S6.** The Distribution of Global Self-rated Health Status by Age-comparative Self-rated

Health Status

| <b>Global self-rated health</b> | <b>Age-comparative self-rated health, N (%)</b> |                |               |                   | <b>Total, N (%)</b> |
|---------------------------------|-------------------------------------------------|----------------|---------------|-------------------|---------------------|
|                                 | <b>Better</b>                                   | <b>Same</b>    | <b>Worse</b>  | <b>Don't Know</b> |                     |
| <b>Excellent</b>                | 46 875 (51.7)                                   | 39414 (12.8)   | 717 (1.0)     | 1334 (8.9)        | 88340 (18.2)        |
| <b>Good</b>                     | 30 651 (33.8)                                   | 105 831 (34.2) | 2 862 (4.0)   | 1678 (11.2)       | 141022 (29.0)       |
| <b>Fair</b>                     | 12 320 (13.6)                                   | 157 926 (51.1) | 31 521 (43.9) | 10391 (69.3)      | 212158 (43.6)       |
| <b>Poor</b>                     | 892 (1.0)                                       | 5851 (1.9)     | 36 691 (51.1) | 1587 (10.6)       | 45021 (9.3)         |
| <b>Total, N (%)</b>             | 90 738 (18.6)                                   | 309 022 (63.5) | 71791 (14.8)  | 14990 (3.1)       | 486541              |



**Table S7.** Sensitivity Analysis: Risk of Ischemic Heart Disease According to Two Measures of Self-rated Health Status

| Excluding participants with baseline conditions | Major depression  | Baseline comorbidities | Died or developed IHD in the first 2 years |
|-------------------------------------------------|-------------------|------------------------|--------------------------------------------|
|                                                 | (n=2,972)         | (n=238,007)            | (n=9,147)                                  |
|                                                 | HR (95% CI)       | HR (95% CI)            | HR (95% CI)                                |
| <b>Global self-rated health</b>                 |                   |                        |                                            |
| <b>Excellent</b>                                | 1.00              | 1.00                   | 1.00                                       |
| <b>Good</b>                                     | 1.02 (0.98, 1.07) | 1.05 (0.98, 1.13)      | 1.06 (1.01, 1.11)                          |
| <b>Fair</b>                                     | 1.32 (1.27, 1.37) | 1.32 (1.24, 1.41)      | 1.32 (1.26, 1.37)                          |
| <b>Poor</b>                                     | 1.78 (1.69, 1.87) | 1.88 (1.72, 2.06)      | 1.76 (1.66, 1.86)                          |
| <b>Age-comparative self-rated health</b>        |                   |                        |                                            |
| <b>Better</b>                                   | 1.00              | 1.00                   | 1.00                                       |
| <b>Same</b>                                     | 1.23 (1.19, 1.27) | 1.26 (1.18, 1.33)      | 1.22 (1.17, 1.27)                          |
| <b>Worse</b>                                    | 1.79 (1.71, 1.87) | 1.89 (1.74, 2.04)      | 1.75 (1.67, 1.84)                          |

Hazards ratios (95% confidence interval) were calculated after adjustment for age, marital status, education level, household income, occupation, and menopausal status, sleep problems, cigarette smoking, alcohol drinking, physical activity, body mass index, family history of heart disease, baseline major depression, diabetes, hypertension, and other comorbidities.

**Figure S1.** Risk of Ischemic Heart Disease According to global Self-rated Health Status by study

locations

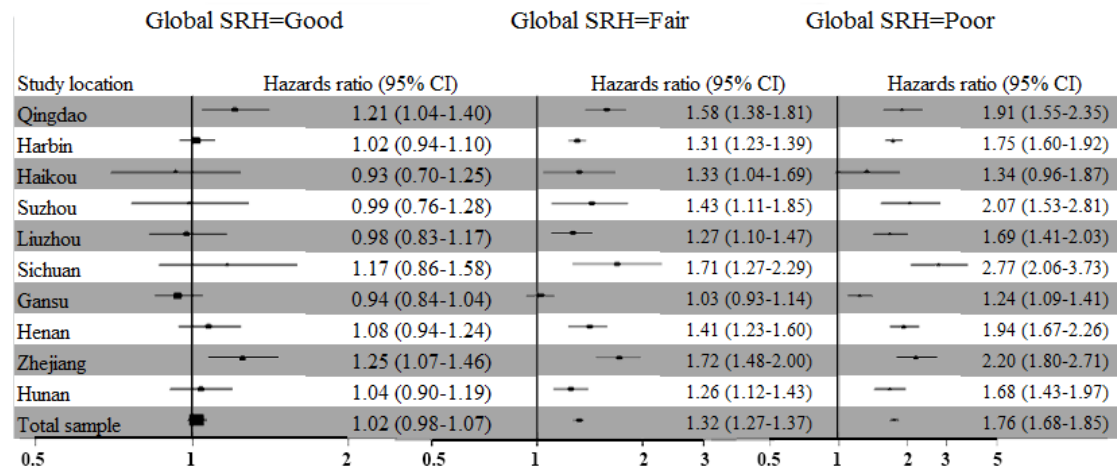

Hazards ratios (95% CI) were calculated after adjustment for age, marital status, education level, household income, occupation, and menopausal status, sleep problems, cigarette smoking, alcohol drinking, physical activity, body mass index, family history of heart disease, and baseline major depression, diabetes, hypertension and other comorbidities.

**Figure S2.** Risk of Ischemic Heart Disease According to Age-comparative Self-rated Health

Status by study locations

| Study location | Age-comparative SRH=Same |                  | Age-comparative SRH=Worse |                  |
|----------------|--------------------------|------------------|---------------------------|------------------|
|                | Hazards ratio (95% CI)   |                  | Hazards ratio (95% CI)    |                  |
| Qingdao        |                          | 1.45 (1.27-1.65) |                           | 2.02 (1.73-2.36) |
| Harbin         |                          | 1.20 (1.13-1.28) |                           | 1.73 (1.59-1.87) |
| Haikou         |                          | 1.40 (1.03-1.91) |                           | 1.76 (1.22-2.55) |
| Suzhou         |                          | 1.21 (0.95-1.53) |                           | 1.82 (1.38-2.41) |
| Liuzhou        |                          | 1.16 (1.04-1.30) |                           | 1.88 (1.64-2.16) |
| Sichuan        |                          | 1.35 (1.15-1.58) |                           | 2.27 (1.93-2.68) |
| Gansu          |                          | 1.04 (0.94-1.14) |                           | 1.19 (1.06-1.33) |
| Henan          |                          | 1.36 (1.23-1.50) |                           | 2.10 (1.86-2.38) |
| Zhejiang       |                          | 1.89 (1.41-2.51) |                           | 2.92 (2.16-3.96) |
| Hunan          |                          | 1.11 (0.95-1.30) |                           | 1.65 (1.38-1.98) |
| Total sample   |                          | 1.23 (1.19-1.27) |                           | 1.78 (1.19-1.27) |

Hazards ratios (95% CI) were calculated after adjustment for age, marital status, education level, household income, occupation, and menopausal status, sleep problems, cigarette smoking, alcohol drinking, physical activity, body mass index, family history of heart disease, and baseline major depression, diabetes, hypertension and other comorbidities.
